# Supplementary material
Source: PubMed Central journal article supplement (PMC8402941)
Supplement: NIHMS1724754-supplement-1724754_Supp_Tab1.pdf [file NIHMS1724754-supplement-1724754_Supp_Tab1.pdf]

**Supplementary Table 1 | Cross-study comparison of ITC cluster nomenclature.**

| References<br>This study               | Busti et al.,2011         | Asede et al.,<br>2015 | Marowsky et al.,<br>2005    | Duvarci and Pare,<br>2014                | Other widely used<br>abbreviations                     |
|----------------------------------------|---------------------------|-----------------------|-----------------------------|------------------------------------------|--------------------------------------------------------|
| Dorsomedial<br>(ITC <sub>dm</sub> )    | Imp/lap/IMG               | mplITC                | medial pc                   | ICM <sub>MD</sub>                        | mITCd, mITC<br>mICN                                    |
| Ventromedial<br>(ITC <sub>vm</sub> )   | (posterior part of)<br>IN |                       | (posterior part of)<br>main | (posterior part of)<br>ICM <sub>MV</sub> | (posterior part of)<br>mITCv, Im,<br>mainITC, main ICN |
| Anteroventral<br>(ITC <sub>av</sub> )  | (anterior part of)<br>IN  |                       | (anterior part of)<br>main  | (anterior part of)<br>ICM <sub>MV</sub>  | (anterior part of)<br>mITCv, Im,<br>mainITC            |
| Lateral<br>(ITC <sub>l</sub> )         | llp                       |                       | lateral pc                  | ICM <sub>L</sub>                         | lICN                                                   |
| Apical<br>(ITC <sub>ap</sub> )         | ls <sub>LA</sub>          |                       | dorsal pc                   |                                          | dICN                                                   |
| Internal<br>(ITC <sub>int</sub> )      | li <sub>LA</sub>          |                       |                             |                                          |                                                        |
| Posteroventral<br>(ITC <sub>pv</sub> ) |                           |                       |                             |                                          |                                                        |

Because different nomenclature and abbreviations were used for individual ITC clusters in previous work, here we organize them from representative references and summarize their correspondence to our definition used in this study. Of note, our detailed reconstructions led us to distinguish ITC<sub>vm</sub> from a more rostrally located ventral cluster, which we label ITC anteroventral (ITC<sub>av</sub>). Also, we report a new cluster – ITC posteroventral (ITC<sub>pv</sub>), which has not been reported previously.
