# Supplementary material
Source: PubMed Central journal article supplement (PMC8402941)
Supplement: NIHMS1724754-supplement-1724754_Supp_Tab2.pdf [file NIHMS1724754-supplement-1724754_Supp_Tab2.pdf]

## Supplementary Table 2

Summary of repeated measures ANOVA followed by Sidak post-hoc analysis for chemogenetic manipulation experiments.

| Experiment                   |             | Fear conditioning                    |                | Extinction                           |                | Retrieval         |           |                    |           |                                      |                |                                        |
|------------------------------|-------------|--------------------------------------|----------------|--------------------------------------|----------------|-------------------|-----------|--------------------|-----------|--------------------------------------|----------------|----------------------------------------|
|                              |             | <i>F</i> ( <i>DFn</i> , <i>DFd</i> ) | <i>P</i> value | <i>F</i> ( <i>DFn</i> , <i>DFd</i> ) | <i>P</i> value | <i>Cre</i> -      | <i>n</i>  | <i>Cre</i> +       | <i>n</i>  | <i>F</i> ( <i>DFn</i> , <i>DFd</i> ) | <i>P</i> value | Post-hoc <i>P</i> value                |
| <b>vmITC-KORD extinction</b> | Interaction | F (3, 75) = 0.8528                   | P=0.4695       | F (10, 250) = 0.6599                 | P=0.7611       | <b>22.5 ± 3.1</b> | <b>16</b> | <b>37.6 ± 5.2</b>  | <b>11</b> | F (1, 25) = 4.828                    | P=0.0375       | <b>Base 0.684</b><br><b>CS 0.0013</b>  |
|                              | Trials      | F (3, 75) = 79.09                    | P<0.0001       | F (10, 250) = 55.3                   | P<0.0001       |                   |           |                    |           | F (1, 25) = 96.36                    | P<0.0001       |                                        |
|                              | Group       | F (1, 25) = 0.6231                   | P=0.4373       | F (1, 25) = 0.0499                   | P=0.8251       |                   |           |                    |           | F (1, 25) = 8.553                    | P=0.0072       |                                        |
| <i>bilateral</i>             | Interaction | F (3, 54) = 0.3015                   | P=0.8241       | F (10, 180) = 0.7671                 | P=0.6603       |                   |           | <b>41.7 ± 13.1</b> | <b>4</b>  | F (1, 18) = 5.61                     | P=0.0293       |                                        |
|                              | Trials      | F (3, 54) = 35.19                    | P<0.0001       | F (10, 180) = 27.93                  | P<0.0001       |                   |           |                    |           | F (1, 18) = 56.12                    | P<0.0001       |                                        |
|                              | Group       | F (1, 18) = 0.0174                   | P=0.8965       | F (1, 18) = 0.06043                  | P=0.8086       |                   |           |                    |           | F (1, 18) = 4.088                    | P=0.0583       |                                        |
| <i>unilateral</i>            | Interaction | F (3, 63) = 0.8277                   | P=0.4836       | F (10, 210) = 0.5154                 | P=0.8783       |                   |           | <b>35.2 ± 4.4</b>  | <b>7</b>  | F (1, 21) = 2.651                    | P=0.1184       | Base 0.3991                            |
|                              | Trials      | F (3, 63) = 67.17                    | P<0.0001       | F (10, 210) = 40.79                  | P<0.0001       |                   |           |                    |           | F (1, 21) = 104.9                    | P<0.0001       | CS 0.0059                              |
|                              | Group       | F (1, 21) = 1.593                    | P=0.2208       | F (1, 21) = 0.01253                  | P=0.9119       |                   |           |                    |           | F (1, 21) = 7.384                    | P=0.0129       |                                        |
| <b>vmITC-KORD retrieval</b>  | Interaction | F (3, 51) = 0.8326                   | P=0.4695       | F (10, 170) = 0.5599                 | P=0.8448       | <b>27.3 ± 4.9</b> | <b>11</b> | <b>45.8 ± 2.7</b>  | <b>8</b>  | F (1, 17) = 10.15                    | P=0.0054       | <b>Base 0.9478</b><br><b>CS 0.0005</b> |
|                              | Trials      | F (3, 51) = 79.81                    | P<0.0001       | F (10, 170) = 22.9                   | P<0.0001       |                   |           |                    |           | F (1, 17) = 151.5                    | P<0.0001       |                                        |
|                              | Group       | F (1, 17) = 0.3491                   | P=0.4373       | F (1, 17) = 0.00388                  | P=0.9511       |                   |           |                    |           | F (1, 17) = 7.407                    | P=0.0145       |                                        |
| <i>bilateral</i>             | Interaction | F (3, 45) = 2.006                    | P=0.1266       | F (10, 150) = 0.3327                 | P=0.9711       |                   |           | <b>47.2 ± 2.8</b>  | <b>6</b>  | F (1, 15) = 9.225                    | P=0.0083       | Base 0.9653                            |
|                              | Trials      | F (3, 45) = 66.54                    | P<0.0001       | F (10, 150) = 19.2                   | P<0.0001       |                   |           |                    |           | F (1, 15) = 121.8                    | P<0.0001       | CS 0.001                               |
|                              | Group       | F (1, 15) = 0.9281                   | P=0.3506       | F (1, 15) = 1.446e-005               | P=0.9970       |                   |           |                    |           | F (1, 15) = 6.776                    | P=0.0200       |                                        |
| <i>unilateral</i>            | Interaction | F (3, 33) = 0.6634                   | P=0.5805       | F (10, 110) = 0.7059                 | P=0.7172       |                   |           | <b>41.7 ± 8.3</b>  | <b>2</b>  | F (1, 11) = 1.472                    | P=0.2504       |                                        |
|                              | Trials      | F (3, 33) = 60.81                    | P<0.0001       | F (10, 110) = 8.36                   | P<0.0001       |                   |           |                    |           | F (1, 11) = 35.12                    | P<0.0001       |                                        |
|                              | Group       | F (1, 11) = 0.5037                   | P=0.4927       | F (1, 11) = 0.0177                   | P=0.8966       |                   |           |                    |           | F (1, 11) = 1.248                    | P=0.2877       |                                        |
| <b>vmITC-Gq-D retrieval</b>  | Interaction | F (3, 57) = 1.51                     | P=0.2217       | F (2, 38) = 1.475                    | P=0.2415       | <b>57.3 ± 4.6</b> | <b>15</b> | <b>38.9 ± 6.1</b>  | <b>6</b>  | F (1, 19) = 4.727                    | P=0.0425       | <b>Base 0.8994</b><br><b>CS 0.0079</b> |
|                              | Trials      | F (3, 57) = 68.81                    | P<0.0001       | F (2, 38) = 160.2                    | P<0.0001       |                   |           |                    |           | F (1, 19) = 149.9                    | P<0.0001       |                                        |
|                              | Group       | F (1, 19) = 1.641                    | P=0.2156       | F (1, 19) = 0.0096                   | P=0.9230       |                   |           |                    |           | F (1, 19) = 4.821                    | P=0.0407       |                                        |
| <i>bilateral</i>             | Interaction | F (3, 48) = 0.5813                   | P=0.6302       | F (3, 48) = 0.5813                   | P=0.6302       |                   |           | <b>45.6 ± 8.9</b>  | <b>3</b>  | F (1, 16) = 1.119                    | P=0.3058       |                                        |
|                              | Trials      | F (3, 48) = 37.5                     | P<0.0001       | F (3, 48) = 37.5                     | P<0.0001       |                   |           |                    |           | F (1, 16) = 97.37                    | P<0.0001       |                                        |
|                              | Group       | F (1, 16) = 0.6786                   | P=0.4222       | F (1, 16) = 0.6786                   | P=0.4222       |                   |           |                    |           | F (1, 16) = 1.049                    | P=0.3209       |                                        |
| <i>unilateral</i>            | Interaction | F (3, 48) = 1.07                     | P=0.3707       | F (2, 32) = 0.8408                   | P=0.4407       |                   |           | <b>32.2 ± 7.8</b>  | <b>3</b>  | F (1, 16) = 4.873                    | P=0.0422       | Base 0.892                             |
|                              | Trials      | F (3, 48) = 36.13                    | P<0.0001       | F (2, 32) = 90.09                    | P<0.0001       |                   |           |                    |           | F (1, 16) = 73.53                    | P<0.0001       | CS 0.0073                              |

|                                    |             |                      |          |                      |          |                   |           |                    |           |                   |          |                                            |
|------------------------------------|-------------|----------------------|----------|----------------------|----------|-------------------|-----------|--------------------|-----------|-------------------|----------|--------------------------------------------|
|                                    | Group       | F (1, 16) = 1.061    | P=0.3183 | F (1, 16) = 0.7701   | P=0.3932 |                   |           |                    |           | F (1, 16) = 5.09  | P=0.0384 |                                            |
| <b>dmITC-Gq-D<br/>retrieval</b>    | Interaction | F (3, 54) = 0.4647   | P=0.7081 | F (10, 180) = 0.6699 | P=0.7514 | <b>28.5 ± 3.3</b> | <b>13</b> | <b>45.7 ± 7.6</b>  | <b>7</b>  | F (1, 18) = 6.631 | P=0.0191 | <b>Base 0.9849</b><br><b>CS 0.0044</b>     |
|                                    | Trials      | F (3, 54) = 84.85    | P<0.0001 | F (10, 180) = 64.94  | P<0.0001 |                   |           |                    |           | F (1, 18) = 112.3 | P<0.0001 |                                            |
|                                    | Group       | F (1, 18) = 0.1635   | P=0.6907 | F (1, 18) = 1.042    | P=0.3210 |                   |           |                    |           | F (1, 18) = 4.737 | P=0.0431 |                                            |
| <i>bilateral</i>                   | Interaction | F (3, 45) = 0.5395   | P=0.6577 | F (10, 150) = 0.6676 | P=0.7531 |                   |           | <b>51.3 ± 8.5</b>  | <b>5</b>  | F (1, 15) = 6.28  | P=0.0242 |                                            |
|                                    | Trials      | F (3, 45) = 67.3     | P<0.0001 | F (10, 150) = 39.1   | P<0.0001 |                   |           |                    |           | F (1, 15) = 92.19 | P<0.0001 |                                            |
|                                    | Group       | F (1, 15) = 0.181    | P=0.6766 | F (1, 15) = 0.3969   | P=0.5382 |                   |           |                    |           | F (1, 15) = 4.101 | P=0.0610 |                                            |
| <i>unilateral</i>                  | Interaction | F (3, 42) = 0.645    | P=0.5905 | F (10, 140) = 0.7389 | P=0.6868 |                   |           | <b>31.7 ± 15.0</b> | <b>2</b>  | F (1, 14) = 2.867 | P=0.1126 |                                            |
|                                    | Trials      | F (3, 42) = 42.62    | P<0.0001 | F (10, 140) = 34.55  | P<0.0001 |                   |           |                    |           | F (1, 14) = 60.57 | P<0.0001 |                                            |
|                                    | Group       | F (1, 14) = 2.117    | P=0.1677 | F (1, 14) = 0.7032   | P=0.4158 |                   |           |                    |           | F (1, 14) = 2.8   | P=0.1164 |                                            |
| <b>dmITC-KORD<br/>retrieval</b>    | Interaction | F (3, 72) = 0.1379   | P=0.9370 | F (2, 48) = 0.6476   | P=0.5278 | <b>55.8 ± 4.2</b> | <b>15</b> | <b>30.9 ± 4.8</b>  | <b>11</b> | F (1, 24) = 15.28 | P=0.0007 | <b>Base 0.8952</b><br><b>CS &lt;0.0001</b> |
|                                    | Trials      | F (3, 72) = 100.4    | P<0.0001 | F (2, 48) = 220.6    | P<0.0001 |                   |           |                    |           | F (1, 24) = 180.1 | P<0.0001 |                                            |
|                                    | Group       | F (1, 24) = 0.6777   | P=0.4185 | F (1, 24) = 0.4069   | P=0.5296 |                   |           |                    |           | F (1, 24) = 12.28 | P=0.0018 |                                            |
| <i>bilateral</i>                   | Interaction | F (3, 51) = 0.4864   | P=0.6932 | F (2, 34) = 2.621    | P=0.0874 |                   |           | <b>22.5 ± 7.3</b>  | <b>4</b>  | F (1, 17) = 12.89 | P=0.0023 | Base 0.8888<br>CS <0.0001                  |
|                                    | Trials      | F (3, 51) = 37.9     | P<0.0001 | F (2, 34) = 99.77    | P<0.0001 |                   |           |                    |           | F (1, 17) = 70.84 | P<0.0001 |                                            |
|                                    | Group       | F (1, 17) = 2.566    | P=0.1276 | F (1, 17) = 2.187    | P=0.1575 |                   |           |                    |           | F (1, 17) = 11.03 | P=0.0040 |                                            |
| <i>unilateral</i>                  | Interaction | F (3, 60) = 0.1776   | P=0.9112 | F (2, 40) = 0.001963 | P=0.9980 |                   |           | <b>35.7 ± 5.9</b>  | <b>7</b>  | F (1, 20) = 7.492 | P=0.0127 | Base 0.9557<br>CS 0.0018                   |
|                                    | Trials      | F (3, 60) = 86.85    | P<0.0001 | F (2, 40) = 195.3    | P<0.0001 |                   |           |                    |           | F (1, 20) = 148.1 | P<0.0001 |                                            |
|                                    | Group       | F (1, 20) = 0.00021  | P=0.9887 | F (1, 20) = 0.0539   | P=0.8188 |                   |           |                    |           | F (1, 20) = 5.856 | P=0.0252 |                                            |
| <b>both ITC-KORD<br/>retrieval</b> | Interaction | F (3, 78) = 0.8838   | P=0.4533 | F (10, 260) = 0.6105 | P=0.8045 | <b>27.3 ± 2.7</b> | <b>17</b> | <b>46.4 ± 4.4</b>  | <b>11</b> | F (1, 26) = 11.86 | P=0.0020 | <b>Base 0.688</b><br><b>CS &lt;0.0001</b>  |
|                                    | Trials      | F (3, 78) = 102.3    | P<0.0001 | F (10, 260) = 58.16  | P<0.0001 |                   |           |                    |           | F (1, 26) = 195.7 | P<0.0001 |                                            |
|                                    | Group       | F (1, 26) = 0.02319  | P=0.8801 | F (1, 26) = 0.06923  | P=0.7945 |                   |           |                    |           | F (1, 26) = 15.36 | P=0.0006 |                                            |
| <i>bilateral</i>                   | Interaction | F (3, 63) = 0.2094   | P=0.8895 | F (10, 210) = 0.5152 | P=0.8784 |                   |           | <b>43.9 ± 7.7</b>  | <b>6</b>  | F (1, 21) = 5.318 | P=0.0314 | Base 0.8511<br>CS 0.0022                   |
|                                    | Trials      | F (3, 63) = 68.77    | P<0.0001 | F (10, 210) = 37.58  | P<0.0001 |                   |           |                    |           | F (1, 21) = 107.8 | P<0.0001 |                                            |
|                                    | Group       | F (1, 21) = 0.05664  | P=0.8142 | F (1, 21) = 0.03086  | P=0.8622 |                   |           |                    |           | F (1, 21) = 6.987 | P=0.0152 |                                            |
| <i>unilateral</i>                  | Interaction | F (3, 60) = 1.18     | P=0.3251 | F (10, 200) = 0.721  | P=0.7042 |                   |           | <b>49.3 ± 3.2</b>  | <b>5</b>  | F (1, 20) = 10.24 | P=0.0045 | Base 0.6621<br>CS <0.0001                  |
|                                    | Trials      | F (3, 60) = 53.83    | P<0.0001 | F (10, 200) = 32.47  | P<0.0001 |                   |           |                    |           | F (1, 20) = 137.2 | P<0.0001 |                                            |
|                                    | Group       | F (1, 20) = 0.000214 | P=0.9885 | F (1, 20) = 0.05034  | P=0.8247 |                   |           |                    |           | F (1, 20) = 19.33 | P=0.0003 |                                            |
